# Supplementary material for: Physical Activity Frequency and Depression in the Spanish Population
Source: MDPI journal article supplement (doi:10.3390/ijerph192214704), 2022-11-09
Supplement: s1 [file s1]

**Table S1.** Logarithmic binary regression model for depression.

|                                  | B      | S.E.  | Wald    | df | Sig.  | Exp(B) | 95% C.I.for<br>EXP(B) |       |
|----------------------------------|--------|-------|---------|----|-------|--------|-----------------------|-------|
|                                  |        |       |         |    |       |        | Lower                 | Upper |
| Sex (Women)                      | -0.724 | 0.052 | 192.512 | 1  | 0.000 | 0.485  | 0.438                 | 0.537 |
| Social class (VI)                |        |       | 50.266  | 5  | 0.000 |        |                       |       |
| I                                | -0.601 | 0.109 | 30.620  | 1  | 0.000 | 0.548  | 0.443                 | 0.678 |
| II                               | -0.495 | 0.115 | 18.502  | 1  | 0.000 | 0.610  | 0.486                 | 0.764 |
| III                              | -0.449 | 0.082 | 29.812  | 1  | 0.000 | 0.638  | 0.543                 | 0.750 |
| IV                               | -0.223 | 0.086 | 6.769   | 1  | 0.009 | 0.800  | 0.677                 | 0.947 |
| V                                | -0.221 | 0.070 | 9.861   | 1  | 0.002 | 0.801  | 0.698                 | 0.920 |
| Age                              | 0.025  | 0.002 | 287.279 | 1  | 0.000 | 1.026  | 1.023                 | 1.029 |
| PA Frequency (Never)             |        |       | 25.143  | 3  | 0.000 |        |                       |       |
| Occasional                       | -0.286 | 0.062 | 21.018  | 1  | 0.000 | 0.751  | 0.664                 | 0.849 |
| Various/month                    | -0.449 | 0.124 | 13.181  | 1  | 0.000 | 0.638  | 0.501                 | 0.813 |
| Various/week                     | -0.367 | 0.113 | 10.558  | 1  | 0.001 | 0.693  | 0.555                 | 0.864 |
| PA Days (None)                   |        |       | 14.108  | 3  | 0.003 |        |                       |       |
| 1-2 days                         | 0.046  | 0.099 | 0.213   | 1  | 0.644 | 1.047  | 0.862                 | 1.272 |
| 3-4 days                         | -0.294 | 0.102 | 8.313   | 1  | 0.004 | 0.745  | 0.610                 | 0.910 |
| 5+ days                          | -0.209 | 0.088 | 5.677   | 1  | 0.017 | 0.811  | 0.683                 | 0.964 |
| Strength training days<br>(None) |        |       | 10.612  | 3  | 0.014 |        |                       |       |
| 1-2 days                         | -0.447 | 0.146 | 9.423   | 1  | 0.002 | 0.639  | 0.481                 | 0.851 |
| 3-4 days                         | 0.074  | 0.141 | 0.276   | 1  | 0.599 | 1.077  | 0.817                 | 1.419 |
| 5+ days                          | -0.133 | 0.175 | 0.580   | 1  | 0.446 | 0.875  | 0.621                 | 1.234 |
| Constant                         | -3.195 | 0.208 | 236.416 | 1  | 0.000 | 0.041  |                       |       |

B: Understandardized beta; SE: Standard error of the regression; Wald: Wald Chi-Squared Test; Df: Degrees of freedom; Sig: Statistical significance; Exp: Exponential regression; CI: Confidence Interval

**Table S2.** Logarithmic binary regression model for depression symptoms.

|                        | B      | S.E.  | Wald    | df | Sig.  | Exp(B) | 95% C.I. for<br>EXP(B) |       |
|------------------------|--------|-------|---------|----|-------|--------|------------------------|-------|
|                        |        |       |         |    |       |        | Lower                  | Upper |
| Sex (Women)            | -0.659 | 0.064 | 104.411 | 1  | 0.000 | 0.517  | 0.456                  | 0.587 |
| Social class (VI)      |        |       | 41.672  | 5  | 0.000 |        |                        |       |
| I                      | -0.731 | 0.140 | 27.229  | 1  | 0.000 | 0.481  | 0.366                  | 0.633 |
| II                     | -0.635 | 0.148 | 18.289  | 1  | 0.000 | 0.530  | 0.396                  | 0.709 |
| III                    | -0.430 | 0.099 | 19.029  | 1  | 0.000 | 0.651  | 0.536                  | 0.789 |
| IV                     | -0.237 | 0.103 | 5.329   | 1  | 0.021 | 0.789  | 0.645                  | 0.965 |
| V                      | -0.293 | 0.085 | 11.978  | 1  | 0.001 | 0.746  | 0.632                  | 0.881 |
| Age                    | 0.023  | 0.002 | 158.749 | 1  | 0.000 | 1.023  | 1.020                  | 1.027 |
| PA Frequency (Never)   |        |       | 38.657  | 3  | 0.000 |        |                        |       |
| Occasional             | -0.453 | 0.077 | 34.714  | 1  | 0.000 | 0.636  | 0.547                  | 0.739 |
| Various/month          | -0.535 | 0.158 | 11.495  | 1  | 0.001 | 0.586  | 0.430                  | 0.798 |
| Various/week           | -0.630 | 0.151 | 17.451  | 1  | 0.000 | 0.533  | 0.396                  | 0.716 |
| PA Days (None)         |        |       | 22.367  | 3  | 0.000 |        |                        |       |
| 1-2 days               | -0.057 | 0.127 | 0.200   | 1  | 0.654 | 0.945  | 0.736                  | 1.213 |
| 3-4 days               | -0.401 | 0.133 | 9.095   | 1  | 0.003 | 0.670  | 0.516                  | 0.869 |
| 5+ days                | -0.499 | 0.119 | 17.573  | 1  | 0.000 | 0.607  | 0.481                  | 0.767 |
| Strength training days |        |       | 5.699   | 3  | 0.127 |        |                        |       |
| (None)                 |        |       |         |    |       |        |                        |       |
| 1-2 days               | -0.224 | 0.182 | 1.516   | 1  | 0.218 | 0.800  | 0.560                  | 1.142 |
| 3-4 days               | 0.009  | 0.196 | 0.002   | 1  | 0.963 | 1.009  | 0.687                  | 1.481 |
| 5+ days                | 0.393  | 0.203 | 3.771   | 1  | 0.052 | 1.482  | 0.996                  | 2.204 |
| Constant               | -3.080 | 0.137 | 508.714 | 1  | 0.000 | 0.046  |                        |       |

B: Understandardized beta; SE: Standard error of the regression; Wald: Wald Chi-Squared Test; Df: Degrees of freedom; Sig: Statistical significance; Exp: Exponential regression; CI: Confidence Interval
